# Supplementary material for: An improved dual-indexing approach for multiplexed 16S rRNA gene sequencing on the Illumina MiSeq platform
Source: PubMed Central journal article supplement (PMC3940169; doi:10.1186/2049-2618-2-6), 2014-02-24

**A.**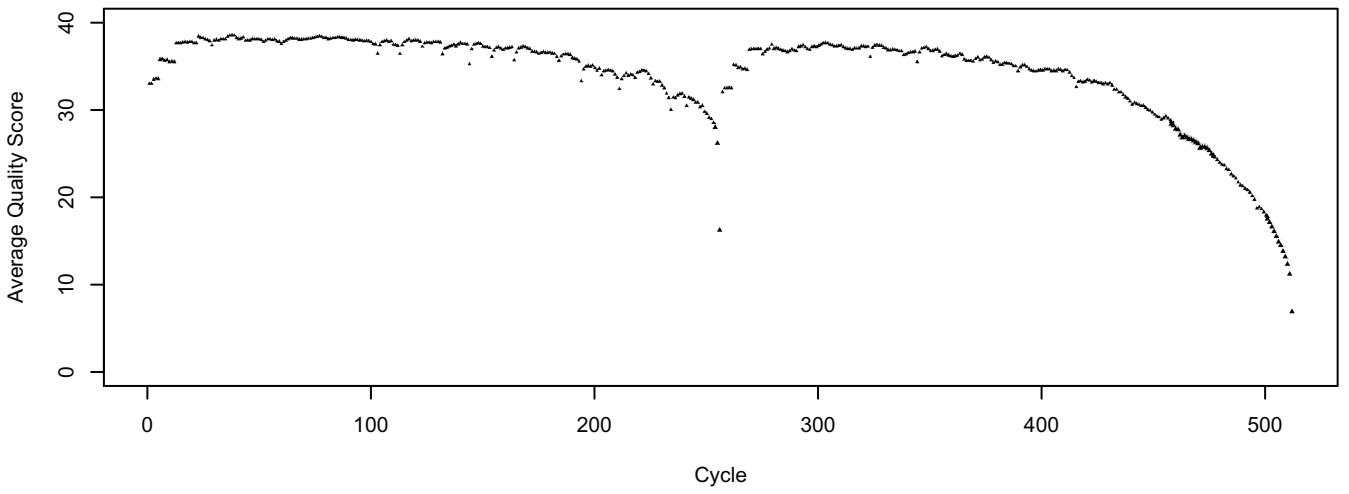**B.**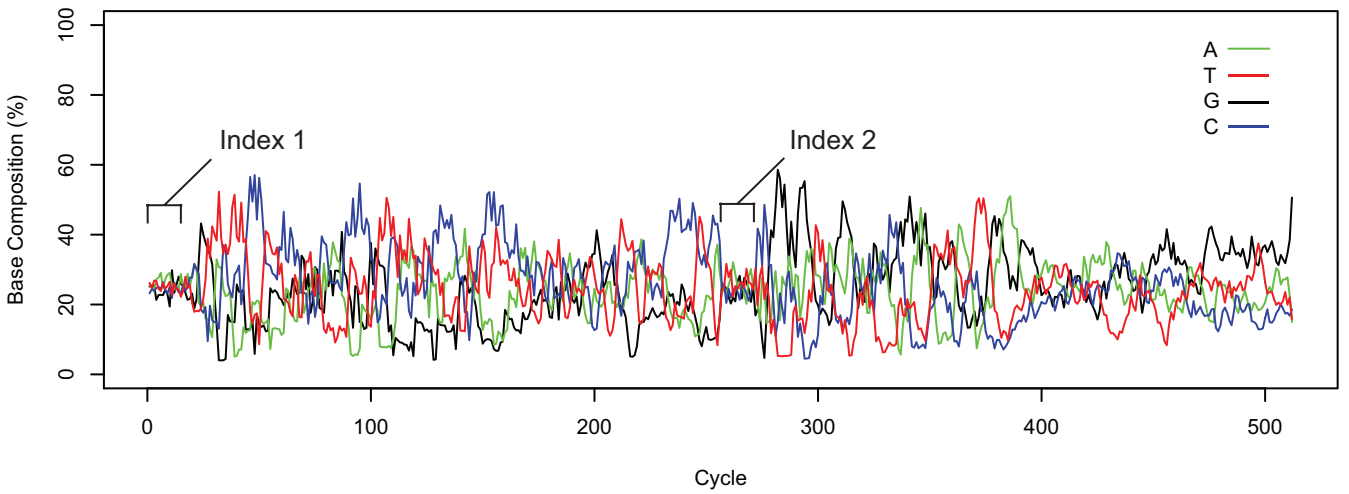**C.**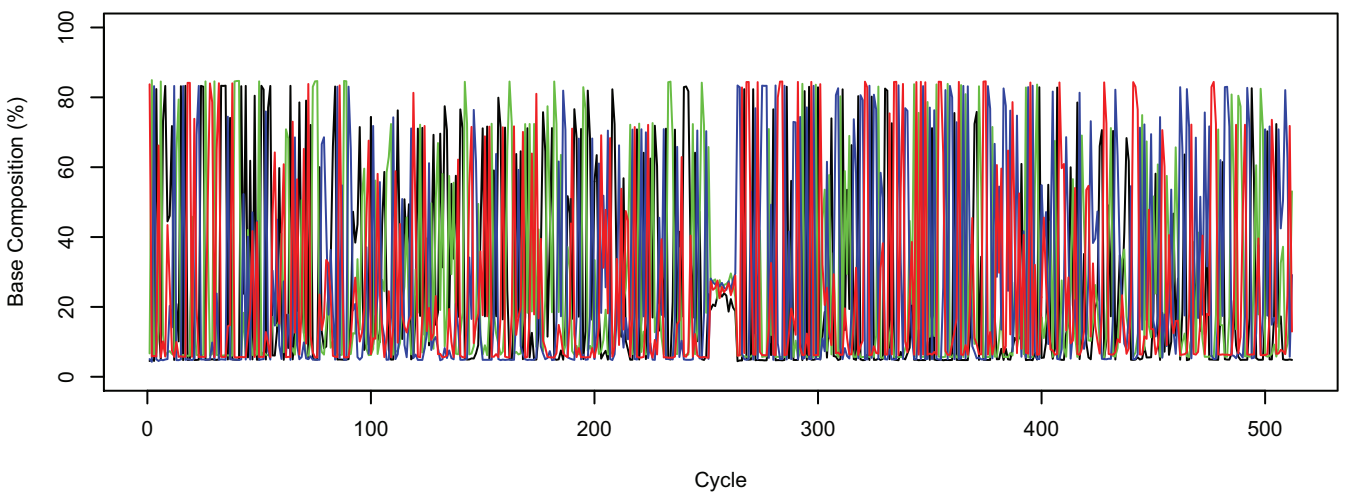

Supplement: 2049-2618-2-6-S1.pdf [file 2049-2618-2-6-S1.pdf]
